# Supplementary material for: TNBC Therapeutics Based on Combination of Fusarochromanone with EGFR Inhibitors
Source: Biomedicines. 2022 Nov 12;10(11):2906. doi: 10.3390/biomedicines10112906 (PMC9687139; doi:10.3390/biomedicines10112906)
Supplement: Supplementary file 1 [file biomedicines-10-02906-s001.zip › biomedicines-1977898-supplementary.pdf]

### **Supplementary Materials**

Figure S1: Crystal Violet Assay: Dose-dependent growth inhibition effect of FC101 in (MDA-MB231)

Figure S2: Western Blotting Experiments: Dose-dependent proteomics effect of FC101 in (MDA-MB231)
